# Supplementary material for: Expression profiles and potential functions of long non-coding RNA in stable angina pectoris patients from Uyghur population of China
Source: PubMed Central journal article supplement (PMC6722491; doi:10.1042/bsr20190364), 2019-09-03
Supplement: bsr20190364_Supp1.pdf [file bsr20190364_Supp1.pdf]

**Supplementary Figure 1.** (A) LncRNA-mRNA network was constructed between the NR\_037652.1 and mRNAs. (B) LncRNA-mRNA network was constructed between the ENST00000607654.1 and mRNAs. (C) LncRNA-mRNA network was constructed between the ENST00000589524.1 and mRNAs. (D) LncRNA-mRNA network was constructed between the uc004bhb.3 and mRNAs.

(A)

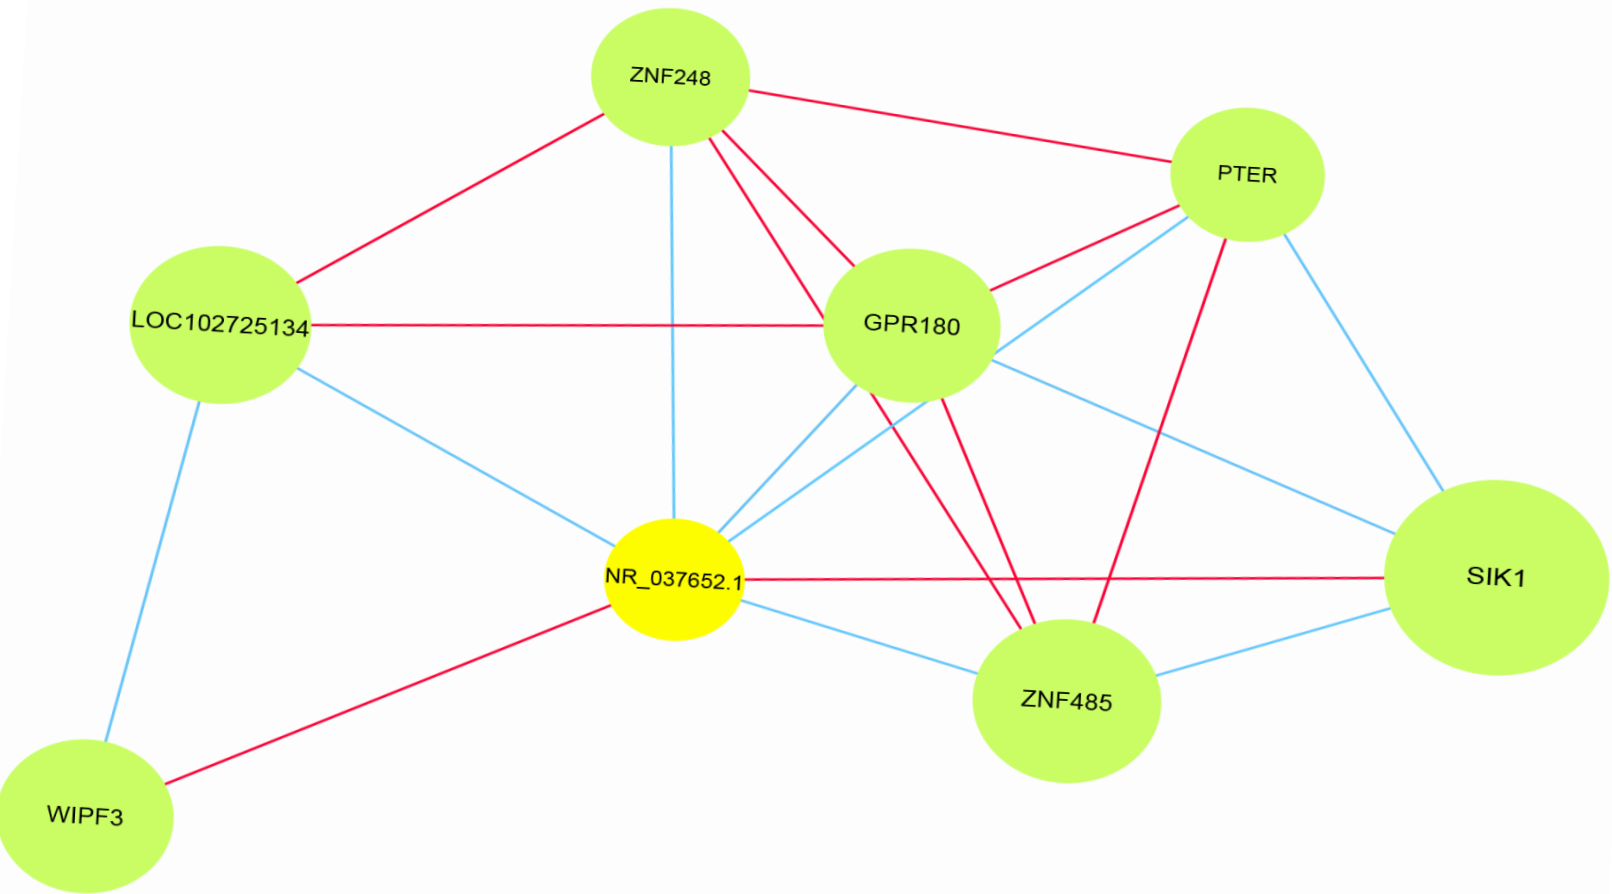

(B)

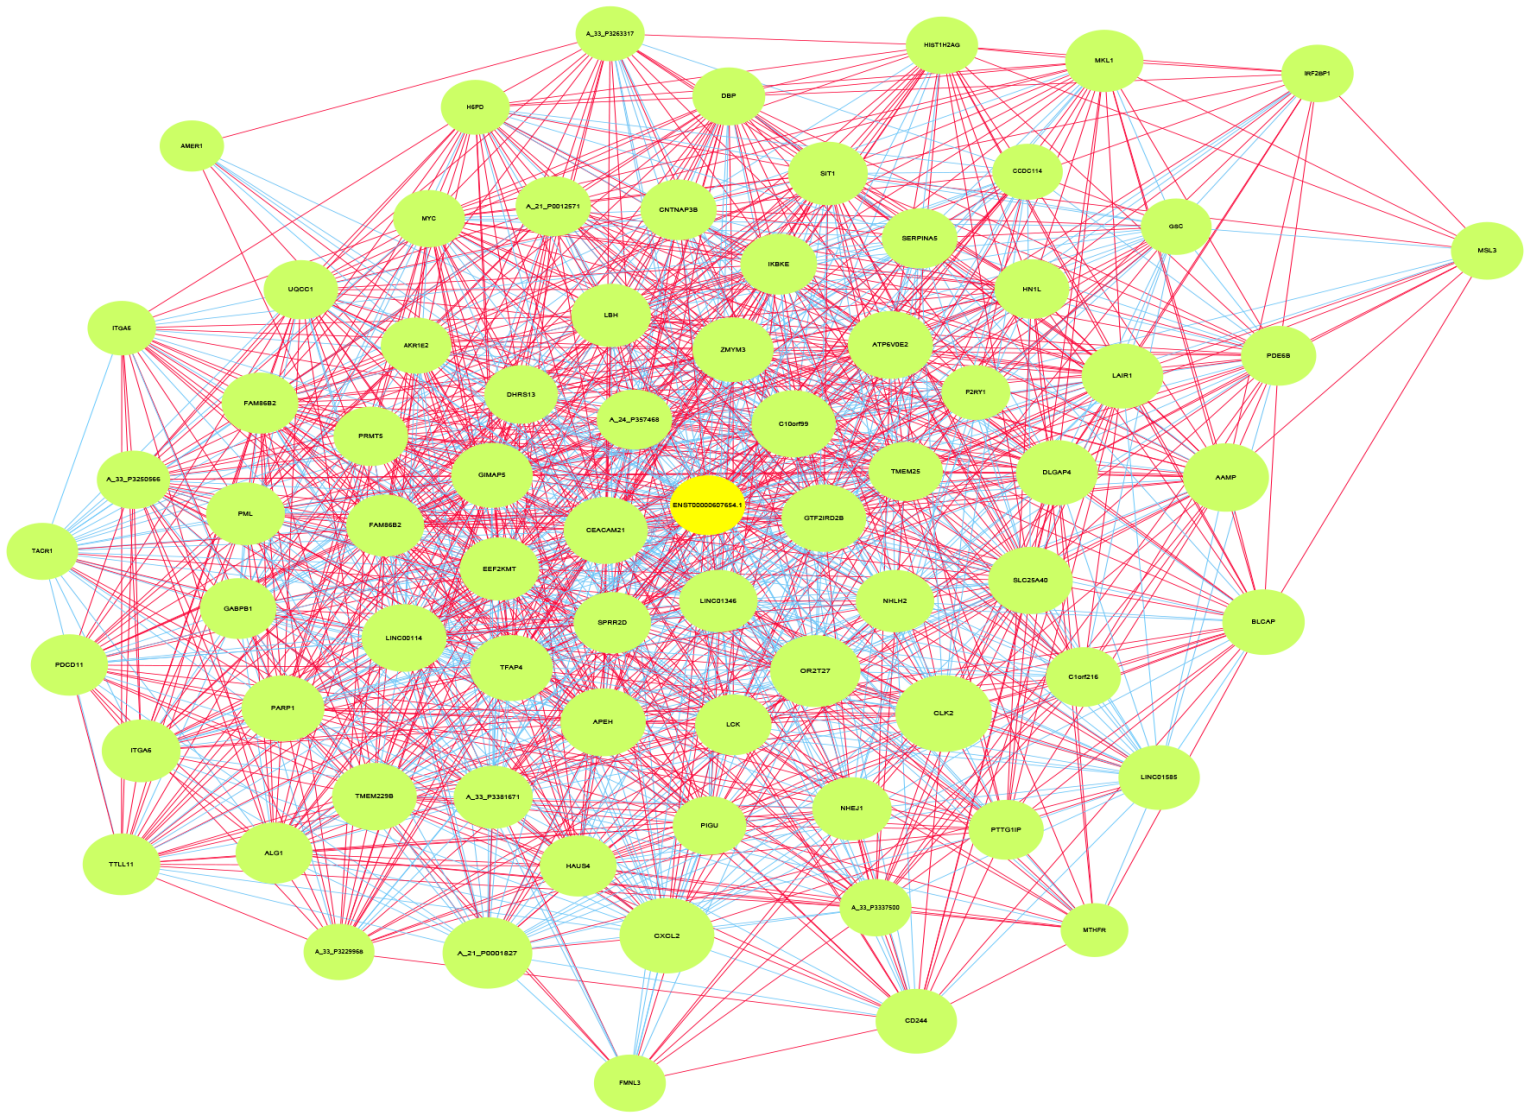

(C)

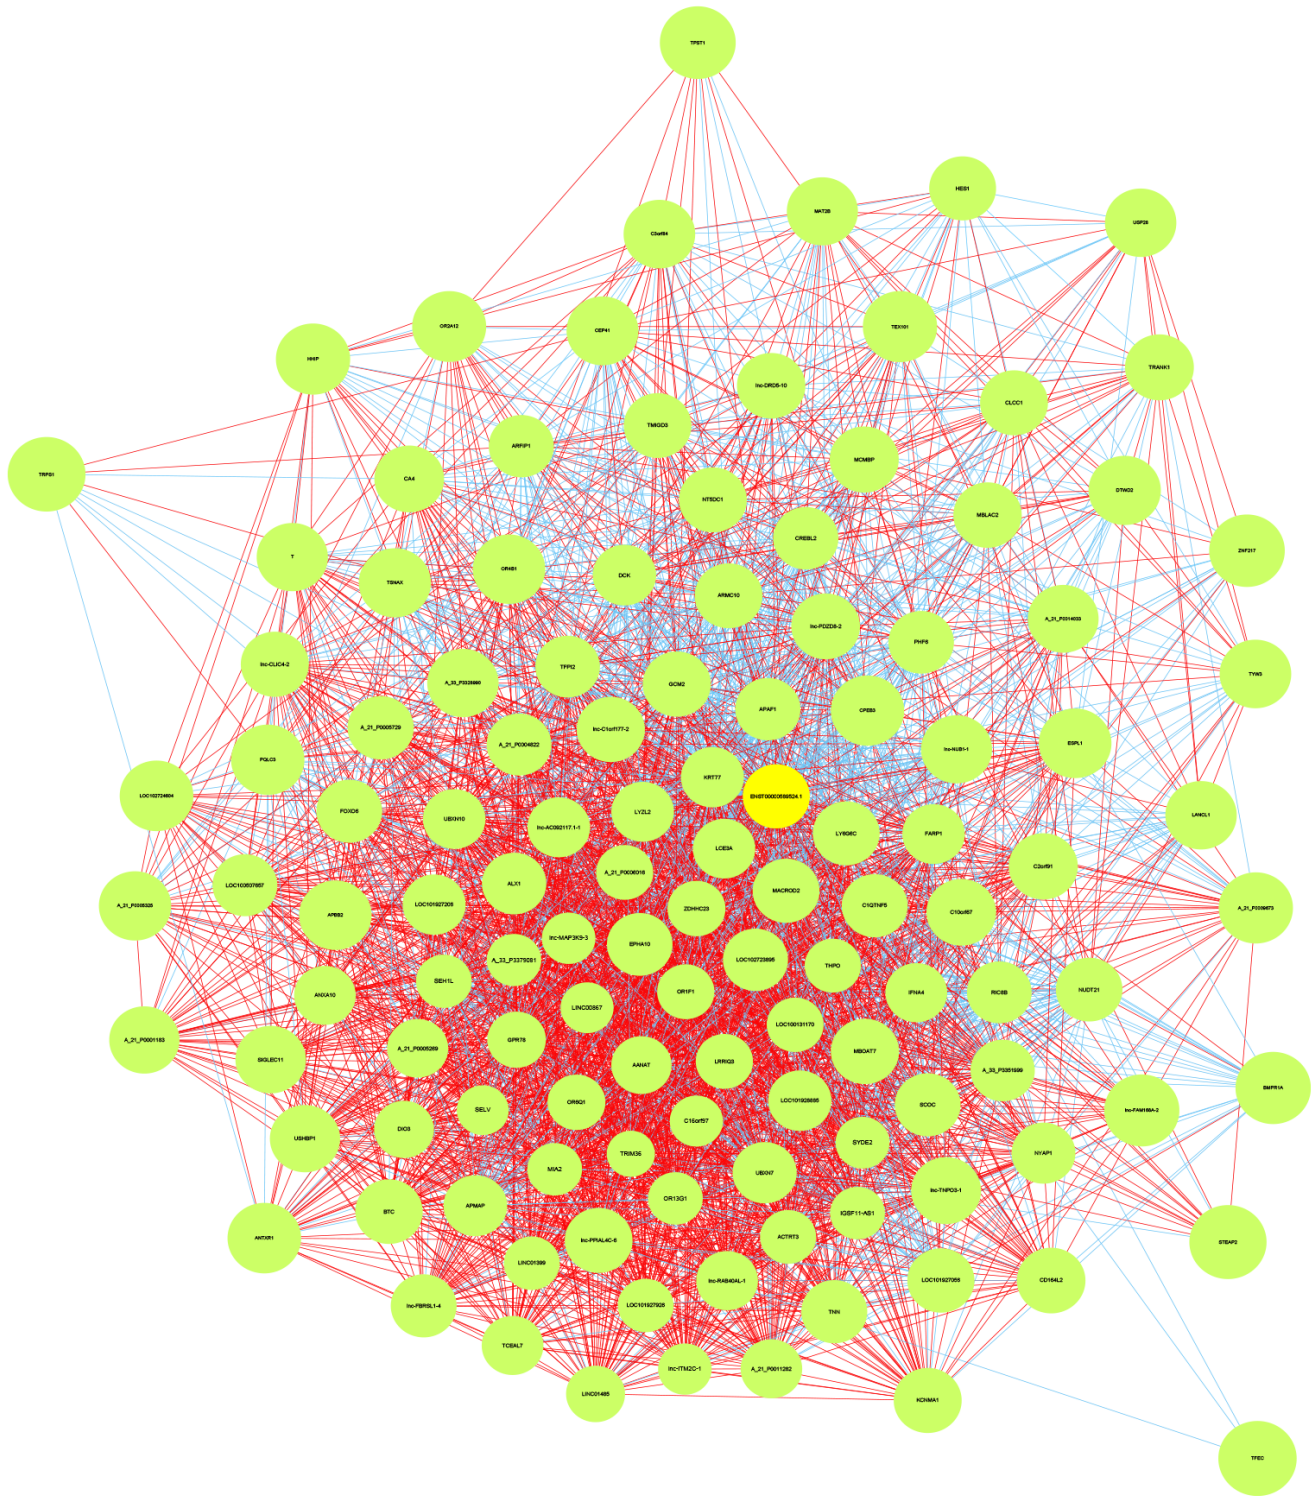

(D)

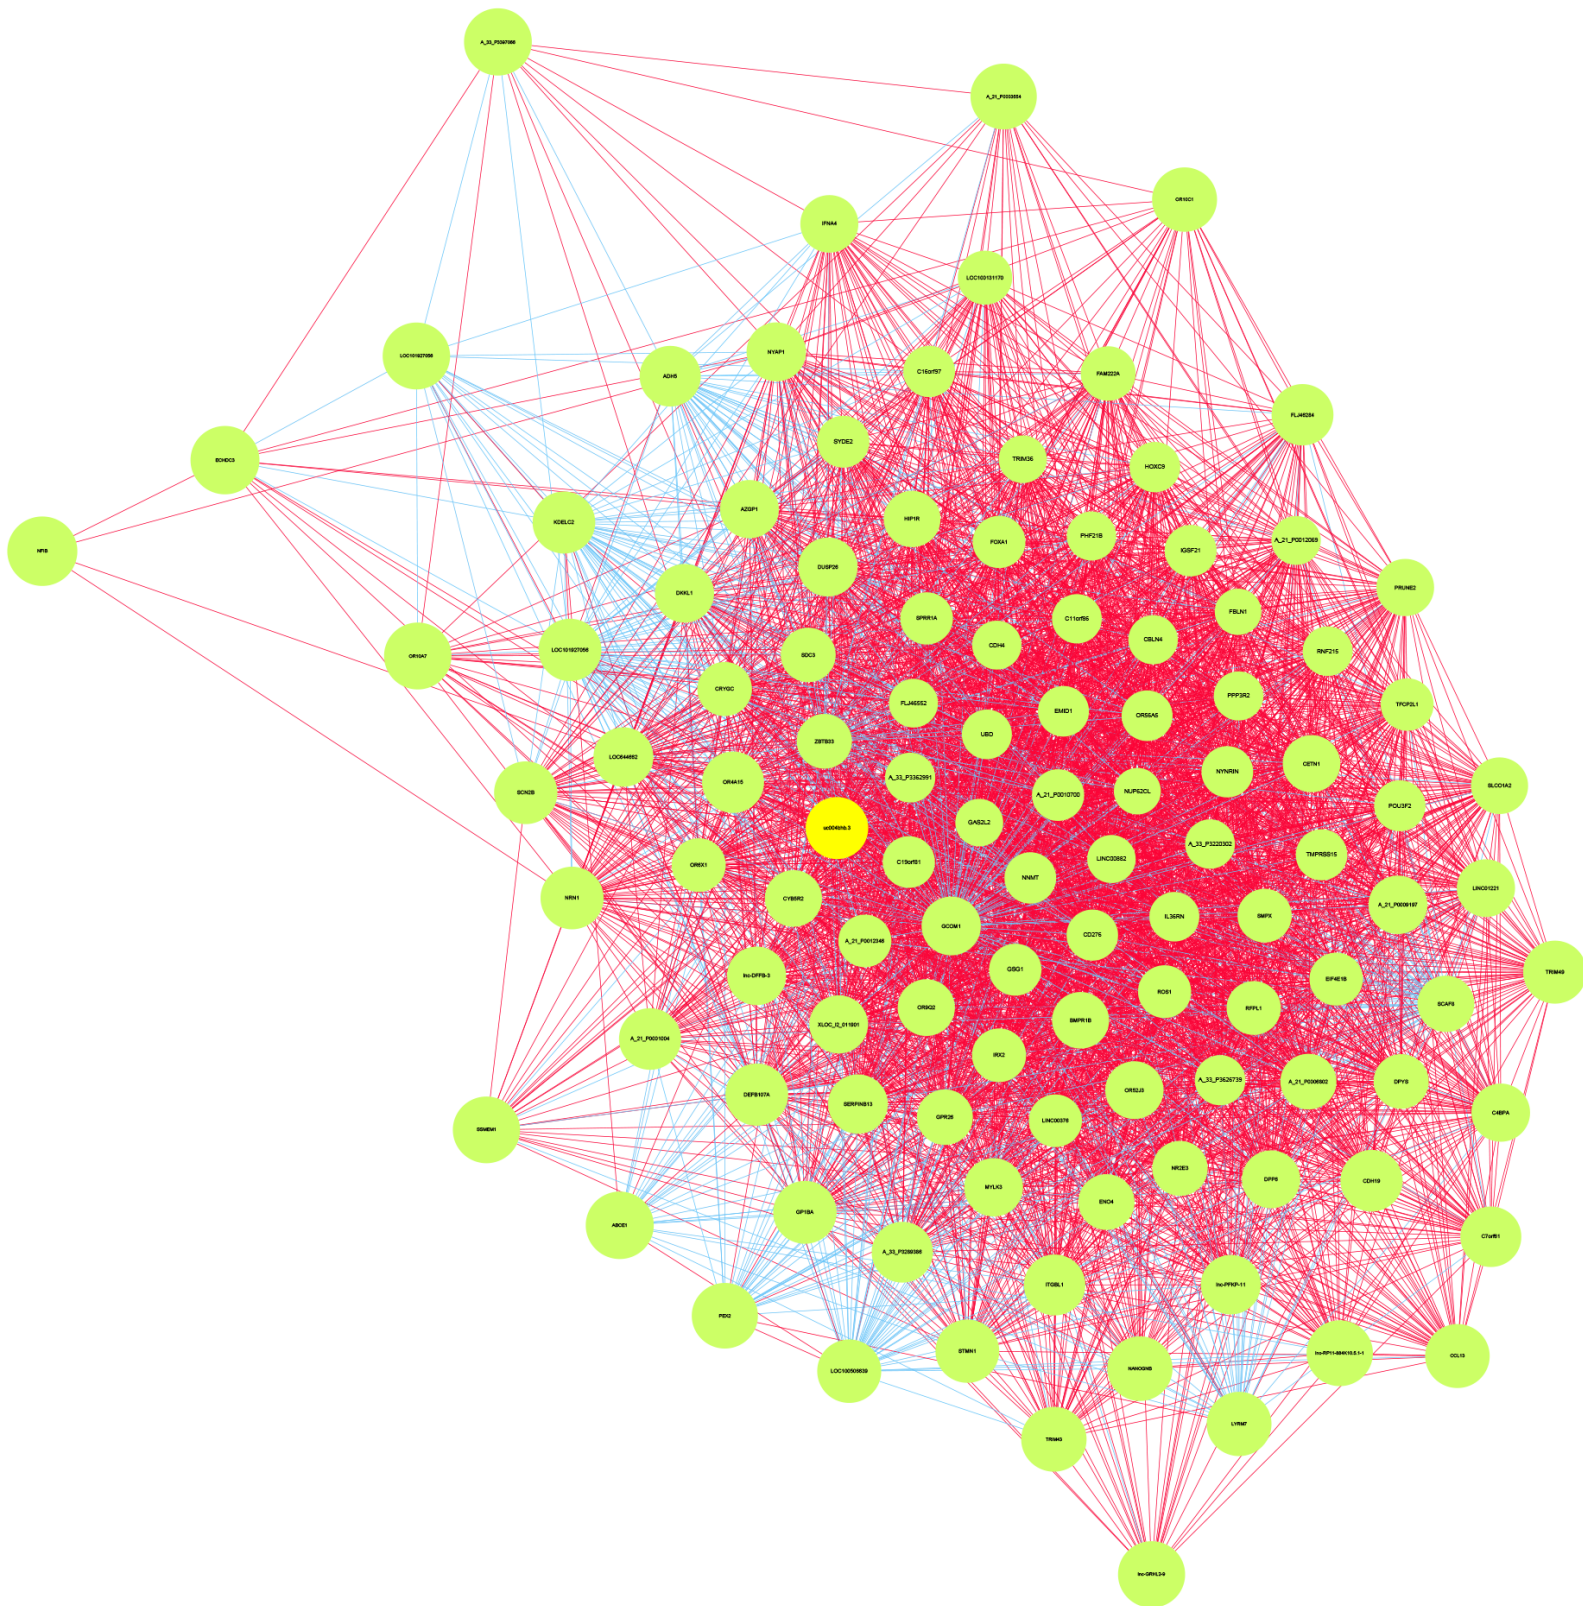

**Supplementary Table S1. PCR primers of four selected lncRNAs.**

| <b>Gene Name</b>  | <b>Forward Primer</b> | <b>Reverse Primer</b> | <b>Hybridization Temperature (°C)</b> |
|-------------------|-----------------------|-----------------------|---------------------------------------|
| NR_037652.1       | GAGGAGGCGGTTTCATCTGTG | GAAGAGCCGGAGGAAAGAGG  | 60                                    |
| ENST00000607654.1 | AGGCACCTCTTATGCTTGCT  | TAATGGGTAGCCAGGGGTCA  | 60                                    |
| ENST00000589524.1 | CATGTGTCTTGGGGTGGCTA  | TGCAAAGAGCTGCAAAGCG   | 60                                    |
| uc004bhb.3        | CAGGGACAGTCGTAGCATGT  | TACTTTCCTTCTCCTGGCAGC | 60                                    |
